# Supplementary material for: Thorough subcells diagnosis in a multi-junction solar cell via absolute electroluminescence-efficiency measurements
Source: PubMed Central journal article supplement — Sci Rep. 2015 Jan 16;5:7836. doi: 10.1038/srep07836 (PMC4296303; doi:10.1038/srep07836), 2015-01-16
Supplement: srep07836-s1.pdf [file srep07836-s1.pdf]

## Supplementary Information

# Thorough subcells diagnosis in a multi-junction solar cell via absolute electroluminescence-efficiency measurements

Shaoqiang Chen<sup>1,2</sup>, Lin Zhu<sup>1</sup>, Masahiro Yoshita<sup>1</sup>, Toshimitsu Mochizuki<sup>1,3</sup>, Changsu Kim<sup>1</sup>, Hidefumi Akiyama<sup>1</sup>, Mitsuru Imaizumi<sup>2</sup>, and Yoshihiko Kanemitsu<sup>3</sup>

<sup>1</sup>*Institute for Solid State Physics, University of Tokyo, and JST-CREST, 5-1-5 Kashiwanoha, Kashiwa, Chiba 277-8581, Japan.*

<sup>2</sup>*Department of Electronic Engineering, East China Normal University, 500 Dongchuan Road, Shanghai 200241, China.*

<sup>3</sup>*Fukushima Renewable Energy Institute, National Institute of Advanced Industrial Science and Technology (AIST), 2-2-9 Machiikedai, Koriyama, Fukushima 963-0215, Japan.*

<sup>4</sup>*Japan Aerospace Exploration Agency (JAXA), Tsukuba, Ibaraki 305-8505 Japan.*

<sup>5</sup>*Institute for Chemical Research, Kyoto University, and JST-CREST, Uji, Kyoto 611-0011, Japan*

Correspondence and requests for materials should be addressed to S.Q.C.(sqchen@ ee.ecnu.edu.cn) or H.A(golgo@issp.u-tokyo.ac.jp).

### Contents:

- I. Solar-cell external quantum efficiency of the tandem solar cell
- II. Balance sheets of carrier and energy of subcells in the tandem solar cell under various operation conditions
- III. Carrier balance diagrams of the tandem solar cell under various operation conditions

## I. Solar-cell external quantum efficiency of the tandem solar cell

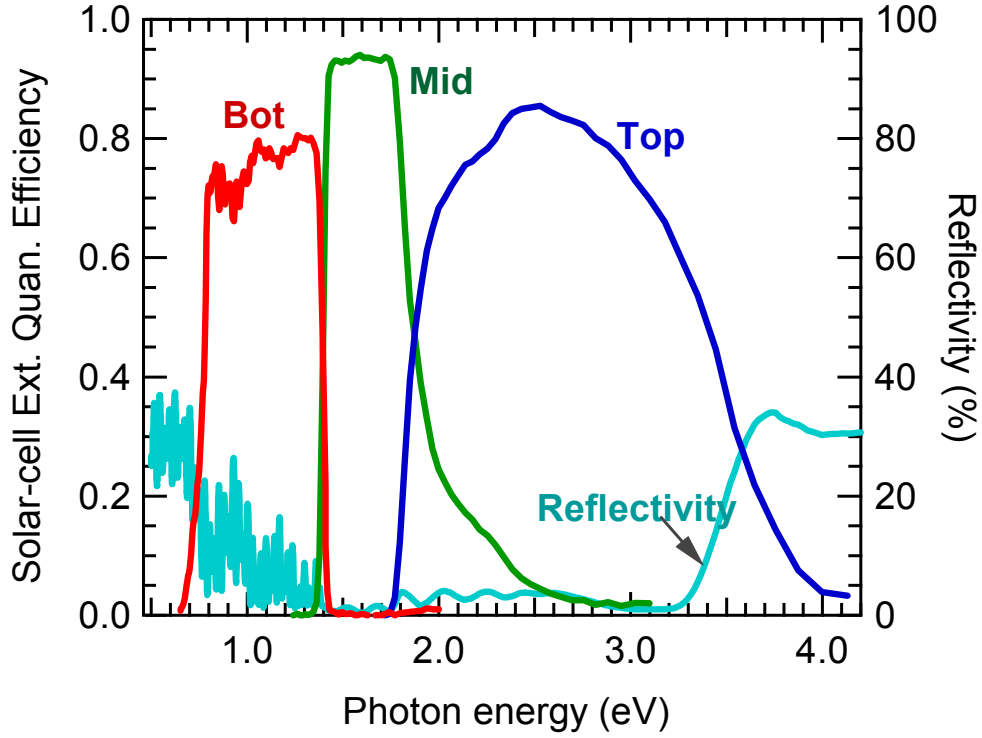

Figure S1. Solar-cell EQE and reflectivity spectrum of the GaInP/GaAs/Ge 3-junction solar cell. EQE measurements were performed with a commercial spectral response measuring equipment. The EQE of the bottom cell was calibrated according to the method proposed by G. Siefer et al. [Ref.S1]. The reflectivity of the solar cell was measured with a spectrophotometer (JASCO-V570).

Ref.S1: Siefer, G., Baur, C. & Bett, A.W. External quantum efficiency measurements of germanium bottom subcells: measurement artifacts and correction procedures, Proceedings of the 35th IEEE Photovoltaic Specialists Conference, 704–707 (2010).

Table S1. Definitions and values of the essential parameters for calculations.

| Parameters                                                                    | Top subcell | Middle subcell | Bottom subcell |
|-------------------------------------------------------------------------------|-------------|----------------|----------------|
| Band-gap $E_{g_i}$ (eV)                                                       | 1.810       | 1.405          | 0.690          |
| Refractive index $n_i$                                                        | 3.50        | 3.55           | 4.00           |
| $\langle EQE_i \rangle_{EL} = \int EQE_i(E) S_{EL}(E) dE / \int S_{EL}(E) dE$ | 0.35        | 0.86           | 0.15           |

## II. Balance sheets of carrier and energy of subcells in the tandem solar cell under various operation conditions

Abbreviations: TR: transmission loss, TH: thermalization loss, EM: external emission loss, NR: non-radiative recombination loss, JN: junction loss, LC: luminescent coupling.

Table S2a. Carrier balance sheet for open-circuit condition ( $J = 0, V = V_{oc}$ ) with 1-sun AM0.

| Cell   | Input (Ratio) |       | Loss (Ratio) |      |       | Output (Ratio) |
|--------|---------------|-------|--------------|------|-------|----------------|
|        | AM0 1Sun      | LC    | EM           | LC   | NR    |                |
| Top    | 1.00          | —     | 8E-04        | 0.01 | 0.989 | 0              |
| Middle | 1.00          | 0.01  | 0.009        | 0.12 | 0.881 | 0              |
| Bottom | 1.00          | 0.081 | 8E-05        | —    | 1.081 | 0              |

Table S2b. Carrier balance sheet for open-circuit condition ( $J = 0, V = V_{oc}$ ) with 1-sun AM0. Unit: mA/cm<sup>2</sup>.

| Cell        | Input (mA/cm <sup>2</sup> ) |       | Loss (mA/cm <sup>2</sup> ) |       |        | Output (mA/cm <sup>2</sup> ) |
|-------------|-----------------------------|-------|----------------------------|-------|--------|------------------------------|
|             | AM0 1Sun                    | LC    | EM                         | LC    | NR     |                              |
| Top cell    | 17.136                      | —     | 0.014                      | 0.173 | 16.949 | 0.000                        |
| Middle cell | 17.916                      | 0.173 | 0.169                      | 2.13  | 15.791 | 0.000                        |
| Bottom cell | 26.434                      | 2.13  | 0.002                      | —     | 28.562 | 0.000                        |

Table S3a. Energy balance sheet for open-circuit condition ( $J = 0, V = V_{oc}$ ) with 1-sun AM0.

| Cell    | Input (Ratio) |         | Loss (Ratio) |         |         |       |    | Output (Ratio) |
|---------|---------------|---------|--------------|---------|---------|-------|----|----------------|
|         | AM0 1Sun      | LC      | TH           | EM      | LC      | NR    | JN |                |
| Top     | 0.305         | —       | 0.076        | 2E-04   | 2E-03   | 0.227 | 0  | 0              |
| Middle  | 0.224         | 2E-03   | 0.038        | 2E-03   | 2E-02   | 0.164 | 0  | 0              |
| Bottom  | 0.207         | 2E-02   | 0.083        | 1E-05   | —       | 0.146 | 0  | 0              |
| TR loss | 0.264         | —       | —            | —       | —       | —     | —  | —              |
| Total   | 1.000         | 2.4E-02 | 0.197        | 2.0E-03 | 2.4E-02 | 0.537 | 0  | 0              |

Table S3b. Energy balance sheet for open-circuit condition ( $J = 0, V = V_{oc}$ ) with 1-sun AM0. Unit: mW/cm<sup>2</sup>.

| Cell    | Input (mW/cm <sup>2</sup> ) |       | Loss (mW/cm <sup>2</sup> ) |       |       |        |    | Output (mW/cm <sup>2</sup> ) |
|---------|-----------------------------|-------|----------------------------|-------|-------|--------|----|------------------------------|
|         | AM0 1Sun                    | LC    | TH                         | EM    | LC    | NR     | JN |                              |
| Top     | 41.21                       | —     | 10.197                     | 0.026 | 0.314 | 30.678 | 0  | 0                            |
| Middle  | 30.22                       | 0.314 | 5.117                      | 0.237 | 2.993 | 22.186 | 0  | 0                            |
| Bottom  | 27.97                       | 2.993 | 11.252                     | 0.001 | —     | 19.708 | 0  | 0                            |
| TR loss | 35.60                       | —     | —                          | —     | —     | —      | —  | —                            |
| Total   | 135.00                      | 3.307 | 26.566                     | 0.264 | 3.307 | 72.572 | 0  | 0                            |

Table S4a. Carrier balance sheet for maximum-output-power condition ( $J = J_m, V = V_m$ ) with 1-sun AM0.

| Cell   | Input (Ratio) |       | Loss (Ratio) |       |       | Output (Ratio) |
|--------|---------------|-------|--------------|-------|-------|----------------|
|        | AM0 1Sun      | LC    | EM           | LC    | NR    |                |
| Top    | 1.00          | —     | 5E-06        | 6E-05 | 0.025 | 0.975          |
| Middle | 1.00          | 6E-05 | 3E-05        | 4E-04 | 0.067 | 0.933          |
| Bottom | 1.00          | 3E-04 | 2E-05        | —     | 0.368 | 0.632          |

Table S4b. Carrier balance sheet for maximum-output-power condition ( $J = J_m, V = V_m$ ) with 1-sun AM0.  
Unit: mA/cm<sup>2</sup>.

| Cell   | Input (mA/cm <sup>2</sup> ) |       | Loss (mA/cm <sup>2</sup> ) |       |       | Output (mA/cm <sup>2</sup> ) |
|--------|-----------------------------|-------|----------------------------|-------|-------|------------------------------|
|        | AM0 1Sun                    | LC    | EM                         | LC    | NR    |                              |
| Top    | 17.136                      | —     | 9.04E-05                   | 0.001 | 0.426 | 16.709                       |
| Middle | 17.916                      | 0.001 | 5.50E-04                   | 0.007 | 1.201 | 16.709                       |
| Bottom | 26.434                      | 0.007 | 5.32E-04                   | —     | 9.732 | 16.709                       |

Table S5a. Energy balance sheet for maximum-output-power condition ( $J = J_m, V = V_m$ ) with 1-sun AM0.

| Cell    | Input (Ratio) |       | Loss (Ratio) |      |       |       |       | Output (Ratio) |
|---------|---------------|-------|--------------|------|-------|-------|-------|----------------|
|         | AM0 1Sun      | LC    | TH           | EM   | LC    | NR    | JN    |                |
| Top     | 0.305         | —     | 0.076        | 1E-6 | 2E-05 | 0.006 | 0.072 | 0.152          |
| Middle  | 0.224         | 2E-05 | 0.037        | 6E-6 | 7E-05 | 0.012 | 0.067 | 0.107          |
| Bottom  | 0.207         | 7E-05 | 0.072        | 3E-6 | —     | 0.050 | 0.057 | 0.028          |
| TR loss | 0.264         | —     | —            | —    | —     | —     | —     | —              |
| Total   | 1.000         | 9E-5  | 0.185        | 1E-5 | 9E-5  | 0.068 | 0.196 | 0.287          |

Table S5b. Energy balance sheet for maximum-output-power condition ( $J = J_m, V = V_m$ ) with 1-sun AM0.  
Unit: mW/cm<sup>2</sup>.

| Cell    | Input (mW/cm <sup>2</sup> ) |       | Loss (mW/cm <sup>2</sup> ) |        |       |       |        | Output (mW/cm <sup>2</sup> ) |
|---------|-----------------------------|-------|----------------------------|--------|-------|-------|--------|------------------------------|
|         | AM0 1Sun                    | LC    | TH                         | EM     | LC    | NR    | JN     |                              |
| Top     | 41.21                       | —     | 10.197                     | 1.6E-4 | 0.002 | 0.771 | 9.685  | 20.558                       |
| Middle  | 30.22                       | 0.002 | 5.047                      | 7.7E-4 | 0.010 | 1.687 | 9.083  | 14.394                       |
| Bottom  | 27.97                       | 0.010 | 9.735                      | 3.7E-4 | —     | 6.715 | 7.743  | 3.786                        |
| TR loss | 35.60                       | —     | —                          | —      | —     | —     | —      | —                            |
| Total   | 135.00                      | 0.012 | 24.979                     | 1.3E-3 | 0.012 | 9.173 | 26.511 | 38.738                       |

### III. Carrier balance diagrams of the tandem solar cell under various operation conditions

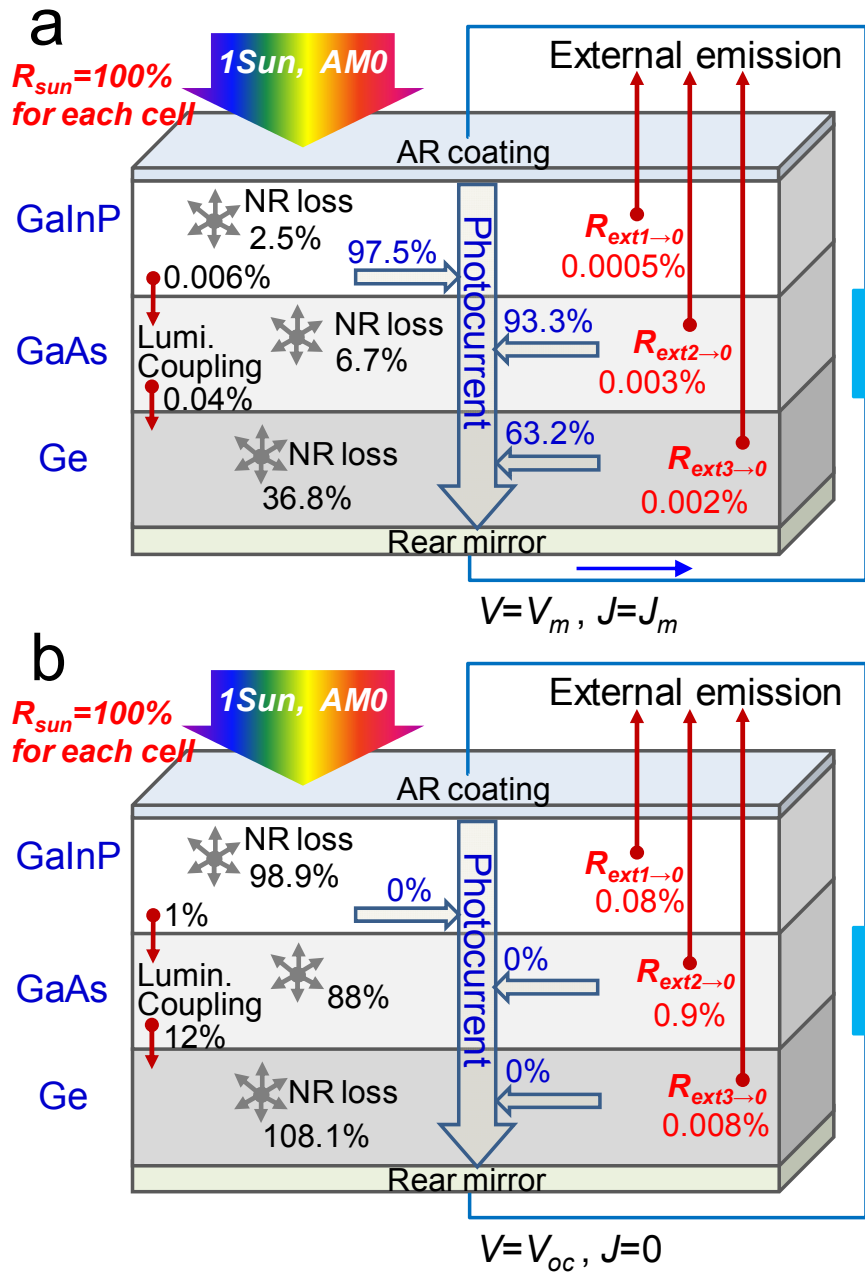

Figure S2. Carrier balance diagrams of solar cell with an irradiation condition of AM0 1Sun. (a) under maximum-output-power working condition and (b) under open-circuit working condition. The input ratios of carriers for all the subcells are normalized to 1, and all the values of the given parameters are ratio.
